# Supplementary material for: Fate mapping via Ms4a3 expression history traces monocyte-derived cells
Source: bioRxiv or medRxiv preprint supplement (doi:10.1101/652032), 2019-05-27

**Figure S1**

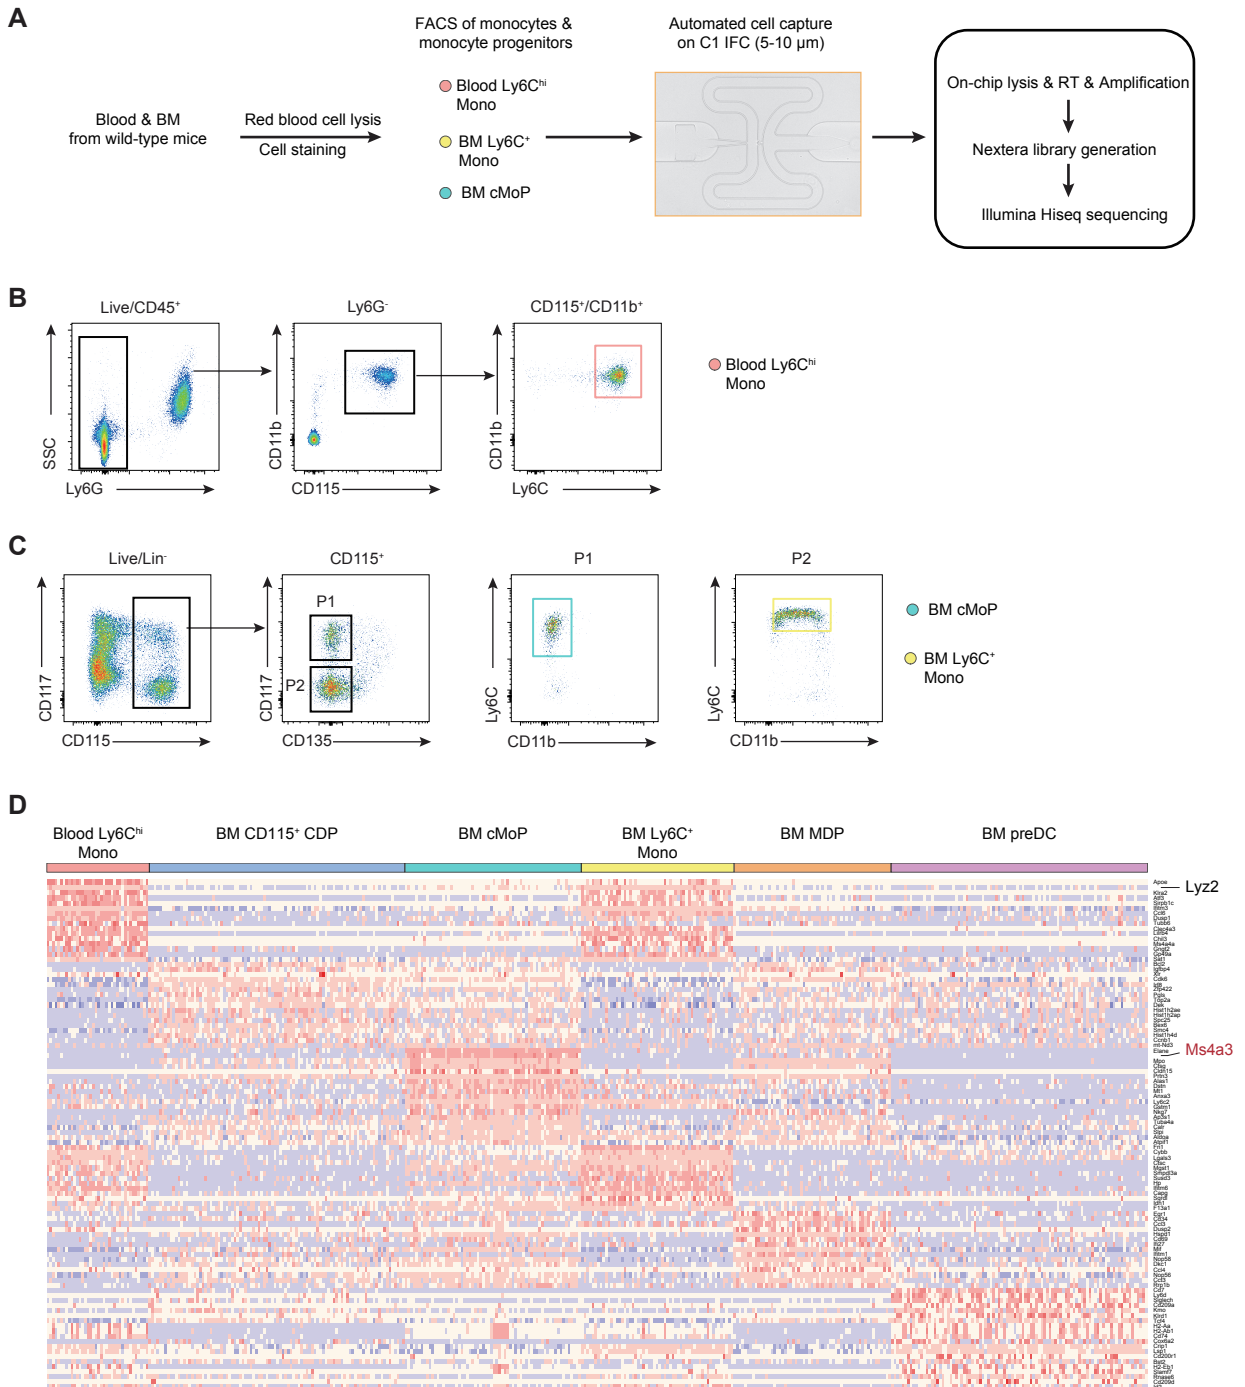



**Figure S3**

**A**

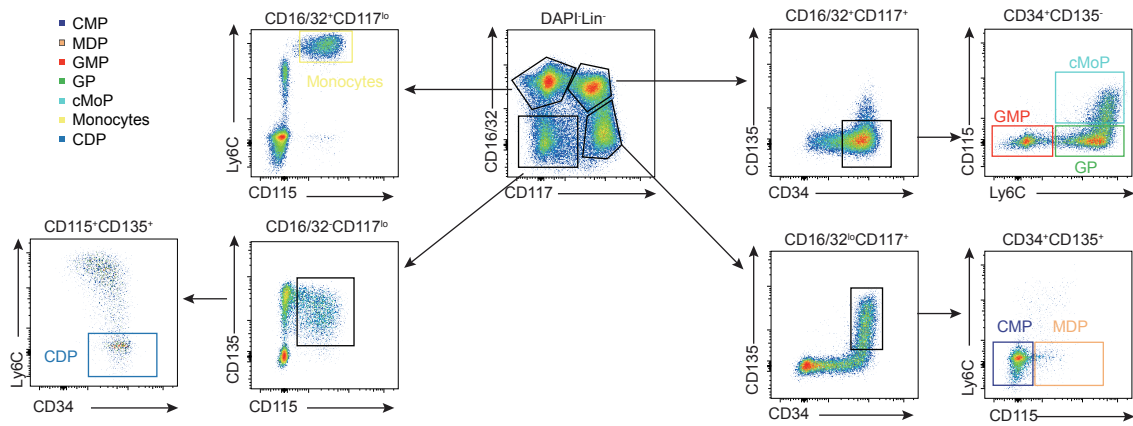

**B**

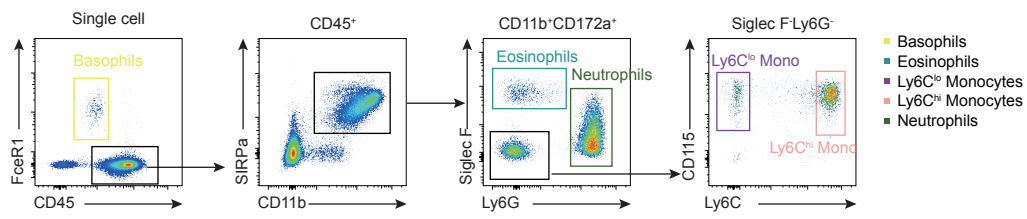

**C**

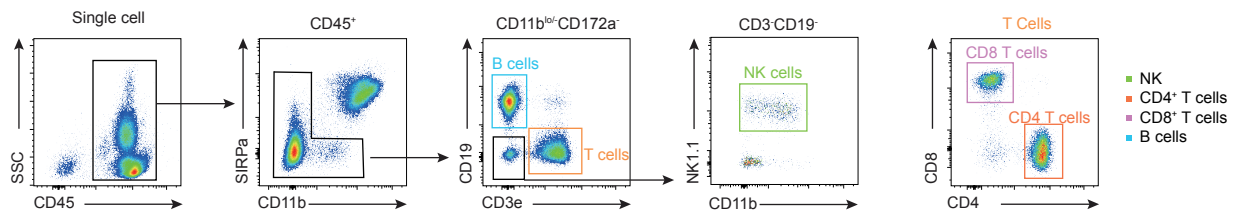

**D**

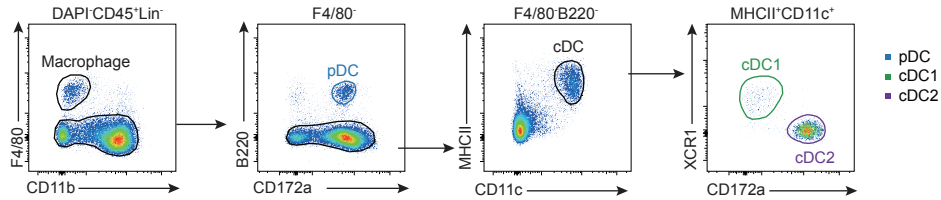

**E**

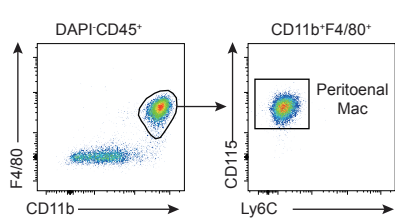

**F**

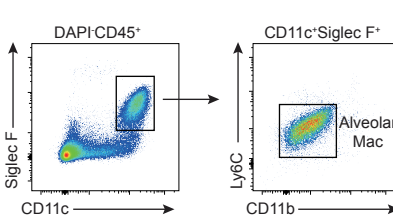

**G**

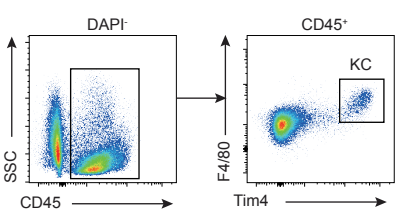

**H**

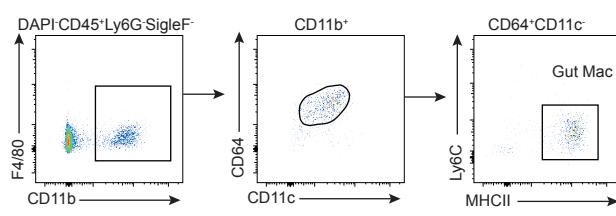

**I**

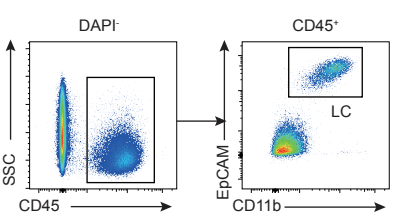

**J**

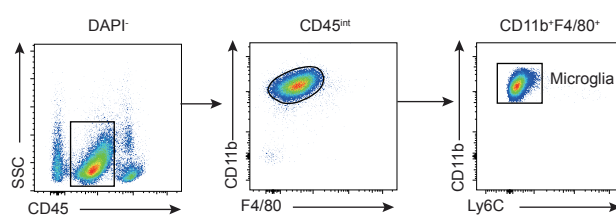

Figure S4

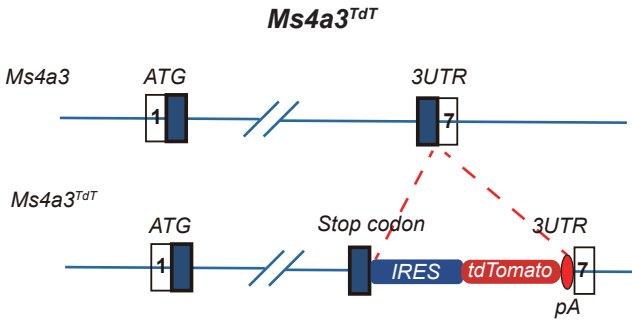

**Figure S5**

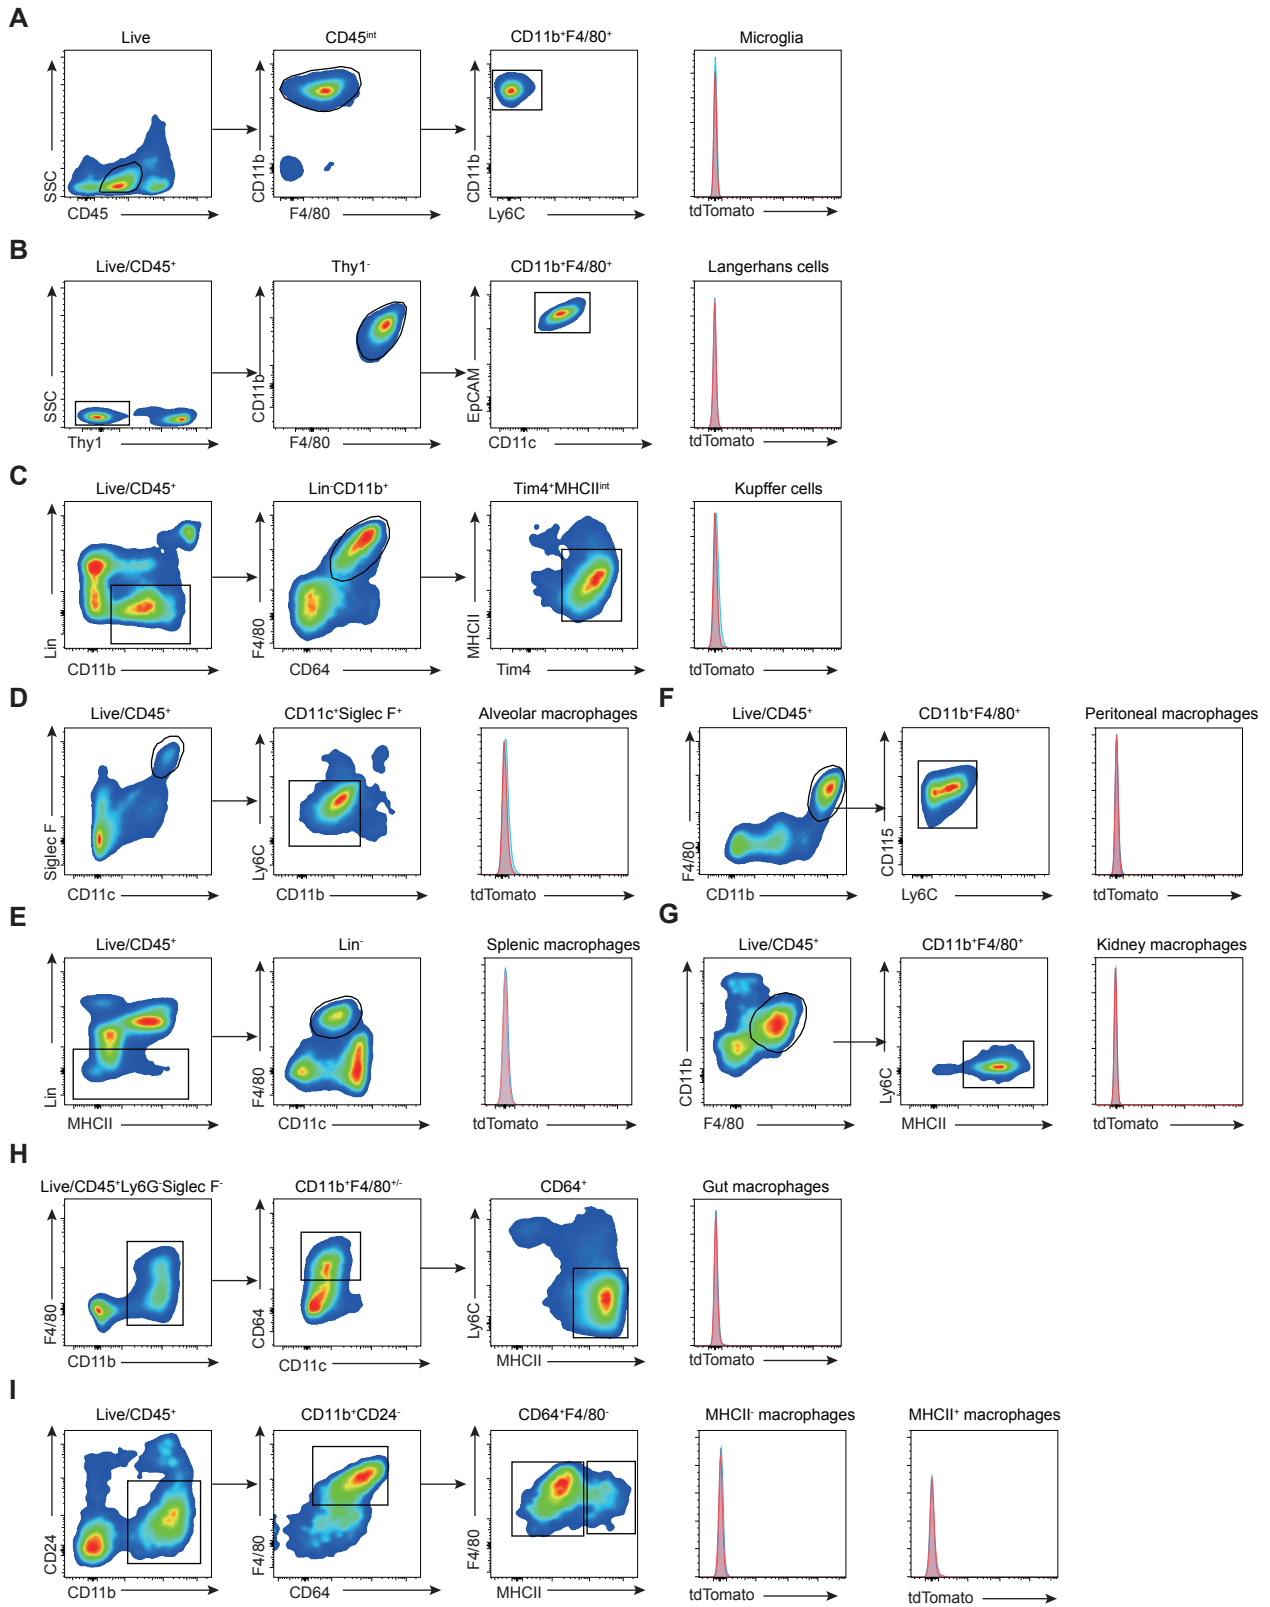

Figure S6

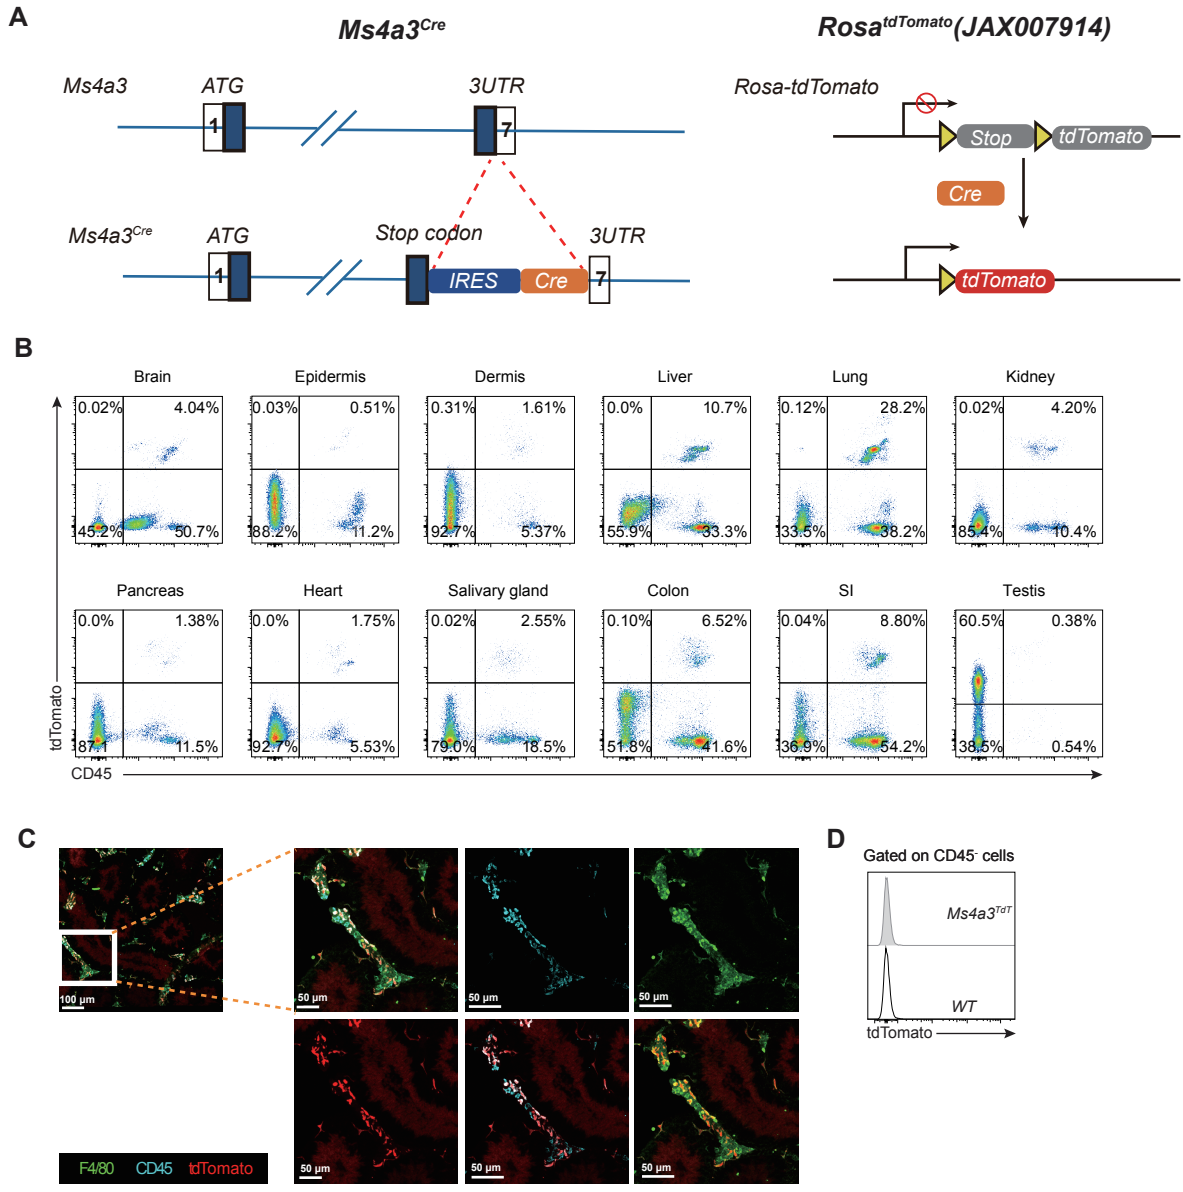



**Figure S8**

**A**

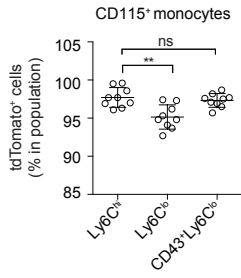

**C**

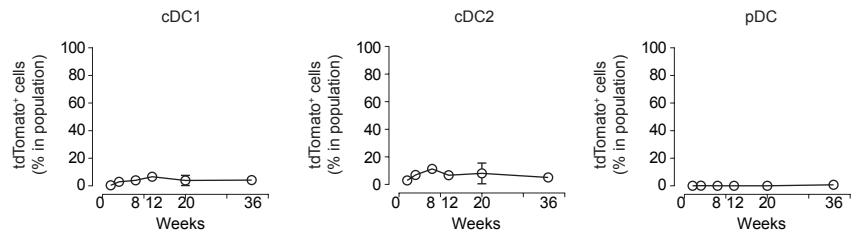

**B**

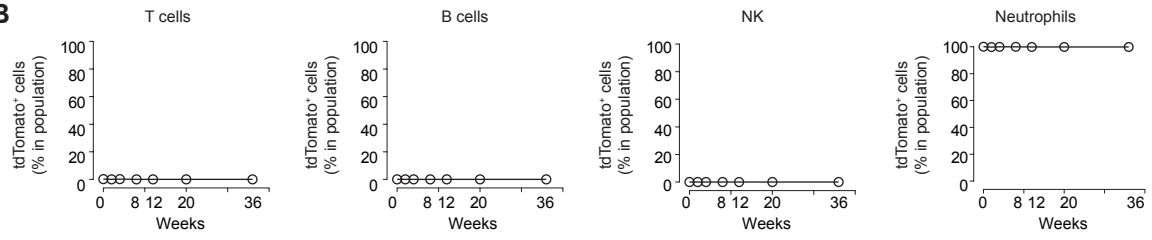

**D**

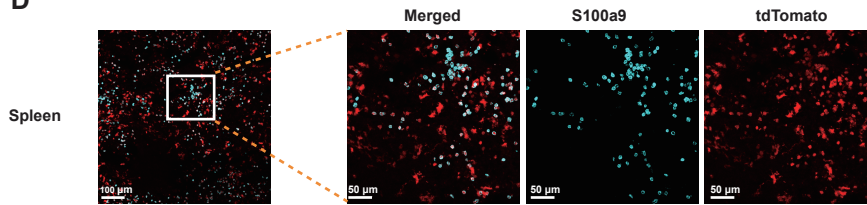



**Figure S8**

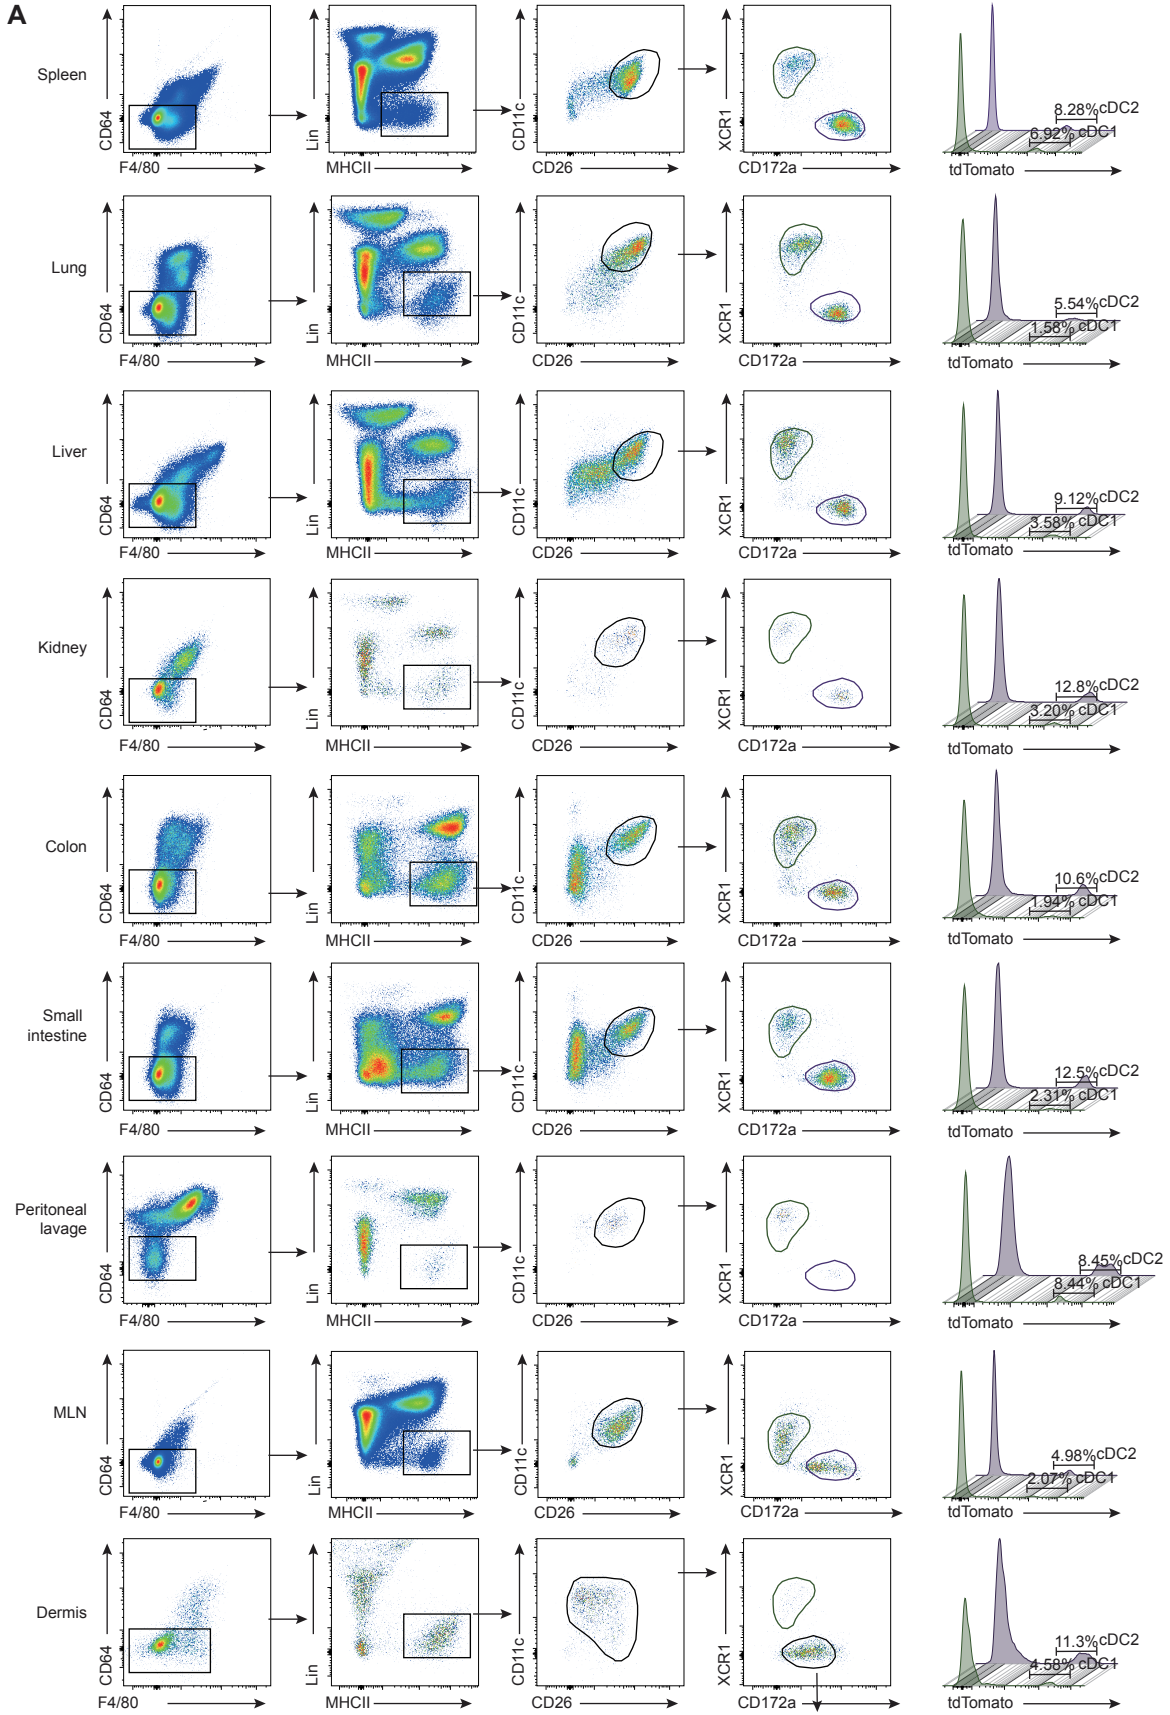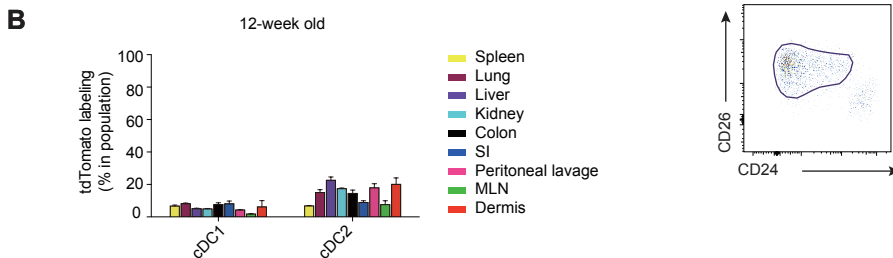

**Figure S10**

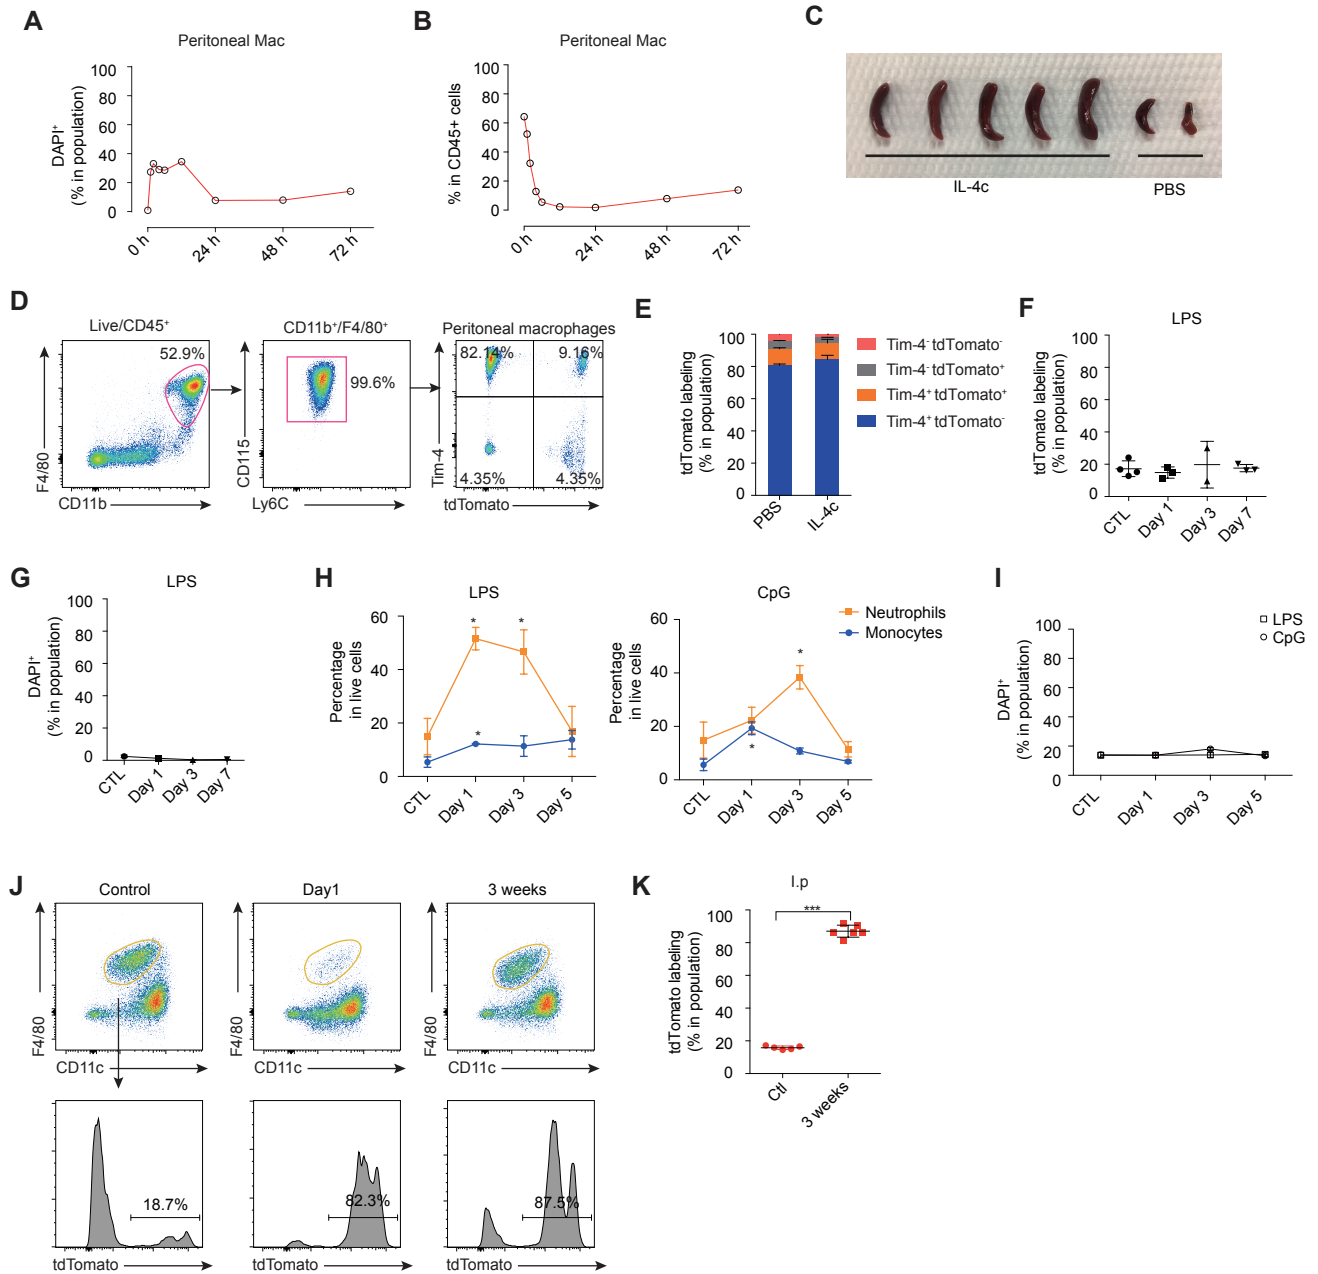

Supplement: Supplementary file [file media-1.pdf]
