# Supplementary material for: Fate mapping via Ms4a3 expression history traces monocyte-derived cells
Source: bioRxiv or medRxiv preprint supplement (doi:10.1101/652032), 2019-05-27
Supplement: Supplementary file [file media-2.pdf]

| <b>CMap DC signature</b> | <b>CMap Macrophage/Monocyte signature</b> |
|--------------------------|-------------------------------------------|
| Adam19                   | 1810011H11Rik                             |
| Amical                   | 4632428N05Rik                             |
| Anpep                    | 6430548M08Rik                             |
| Ap1s3                    | A930039A15Rik                             |
| Ass1                     | Abca1                                     |
| Bcl11a                   | Abcc3                                     |
| Bri3bp                   | Abcc5                                     |
| Btla                     | Acy1                                      |
| Cbfa2t3                  | Apoe                                      |
| Ccr7                     | Arsg                                      |
| Ciita                    | Arsk                                      |
| Cnn2                     | Asph                                      |
| Dpp4                     | Atp13a2                                   |
| Fgl2                     | Atp6ap1                                   |
| Flt3                     | C130050O18Rik                             |
| Gpr114                   | C1qa                                      |
| Gpr132                   | C1qb                                      |
| Gpr68                    | C1qc                                      |
| Gpr82                    | C5ar1                                     |
| H2-Aa                    | Camk1                                     |
| H2-Ab1                   | Cd14                                      |
| H2-DMb2                  | Cd151                                     |
| H2-Eb1                   | Cd164                                     |
| H2-Eb2                   | Cd302                                     |
| Hao                      | Cd33                                      |
| Hmgn3                    | Cebpb                                     |
| Jak2                     | Cmklr1                                    |
| Kit                      | Comt                                      |
| Klri1                    | Csf3r                                     |
| Kmo                      | Ctsd                                      |
| Napsa                    | Ctsf                                      |
| P2ry10                   | Ctsl                                      |
| Pstpip1                  | Dhrs3                                     |
| Pvrl1                    | Dnase2a                                   |
| Rab30                    | Dok3                                      |
| Runx3                    | Emr1                                      |
| Sept6                    | Engase                                    |
| Slamf7                   | Fcgr1                                     |
| Spint2                   | Fcgr4                                     |
| Tbc1d8                   | Fert2                                     |
| Traf1                    | Fez2                                      |
| Zbtb46                   | Fgd4                                      |
|                          | Fpr1                                      |
|                          | Glul                                      |
|                          | Lilra5                                    |
|                          | Gpr160                                    |
|                          | Fcgr3                                     |

|  |         |
|--|---------|
|  | Gbp6    |
|  | Wls     |
|  | Gpr77   |
|  | Hgf     |
|  | Hgsnat  |
|  | Hmox1   |
|  | Il1a    |
|  | Itga9   |
|  | Itgb5   |
|  | Klra2   |
|  | Lamp2   |
|  | Lonrf3  |
|  | Lpl     |
|  | Lrp1    |
|  | Ltc4s   |
|  | Lyplal1 |
|  | Mafb    |
|  | Man2b2  |
|  | Mavs    |
|  | MerTK   |
|  | Mgst1   |
|  | Mitf    |
|  | Mr1     |
|  | Myo7a   |
|  | Nr1d1   |
|  | P2ry13  |
|  | Pcyox1  |
|  | Pecr    |
|  | Pilra   |
|  | Pilrb1  |
|  | Pilrb2  |
|  | Pla2g15 |
|  | Pla2g4a |
|  | Pld1    |
|  | Pld3    |
|  | Plod1   |
|  | Plod3   |
|  | Plxnb2  |
|  | Pon3    |
|  | Pros1   |
|  | Pstpip2 |
|  | Ptgs1   |
|  | Ptplad2 |
|  | Ptpm    |
|  | Rhob    |
|  | Rhoq    |
|  | Rnasel  |
|  | Rnf13   |

|  |          |
|--|----------|
|  | Sepn1    |
|  | Sepp1    |
|  | Serpib6a |
|  | Sesn1    |
|  | Siglece  |
|  | Slc11a1  |
|  | Slc15a3  |
|  | Slc16a10 |
|  | Slc16a7  |
|  | Slc17a5  |
|  | Slc29a1  |
|  | Slc38a6  |
|  | Slc38a7  |
|  | Slc7a2   |
|  | Slco2b1  |
|  | Slpi     |
|  | Snx24    |
|  | Sqrdl    |
|  | St7      |
|  | Tanc2    |
|  | Tbxas1   |
|  | Tcn2     |
|  | Tfpi     |
|  | Tgfbr2   |
|  | Timp2    |
|  | Tlr4     |
|  | Tlr7     |
|  | Tlr8     |
|  | Tmem195  |
|  | Dram2    |
|  | Tmem86a  |
|  | Tnfrsf21 |
|  | Tom1     |
|  | Tpp1     |
|  | Tspan14  |
|  | Tspan4   |
|  | Xrcc5    |
